# Supplementary material for: Combination Treatment with Hydroxytyrosol and Vitamin E Improves NAFLD-Related Fibrosis
Source: MDPI journal article supplement (doi:10.3390/nu14183791), 2022-09-14
Supplement: s1 [file s1]

## Supplementary Data

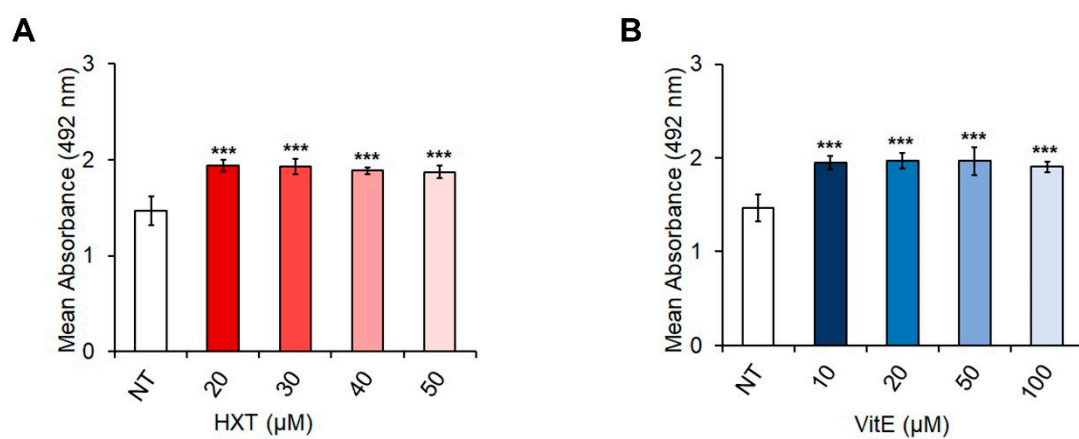

**Figure S1. Treatment with HXT and VitE increases cell viability in LX-2 cells.** Cell viability in LX-2 cells was assessed by XTT assay after 48 h of treatment with HXT (20, 30, 40, and 50  $\mu\text{M}$ ) or VitE (10, 20, 50, and 100  $\mu\text{M}$ ). Data are the mean absorbance of two independent experiments repeated at least in triplicate. Data were analyzed by 2-tailed t tests, \*\*\* $p < 0.001$  vs NT.

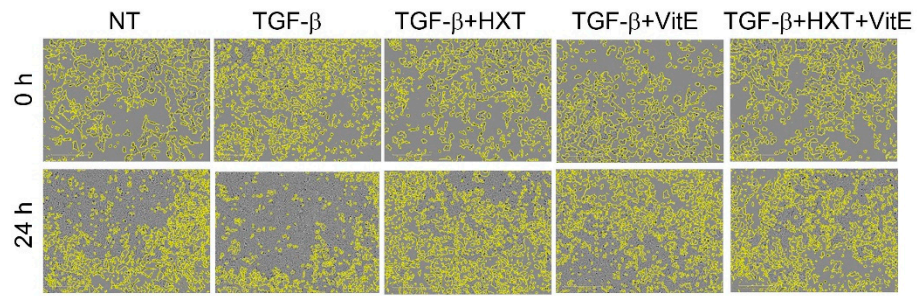

**Figure S2. Live cell imaging with the mask of cells.** Representative images of automatically identified regions of interest using confluence masks (empty areas are represented in yellow) of LX-2 cells NT or treated with TGF- $\beta$  alone or with indicated concentrations of HXT, VitE, or HXT+VitE at 0 and 24 h.

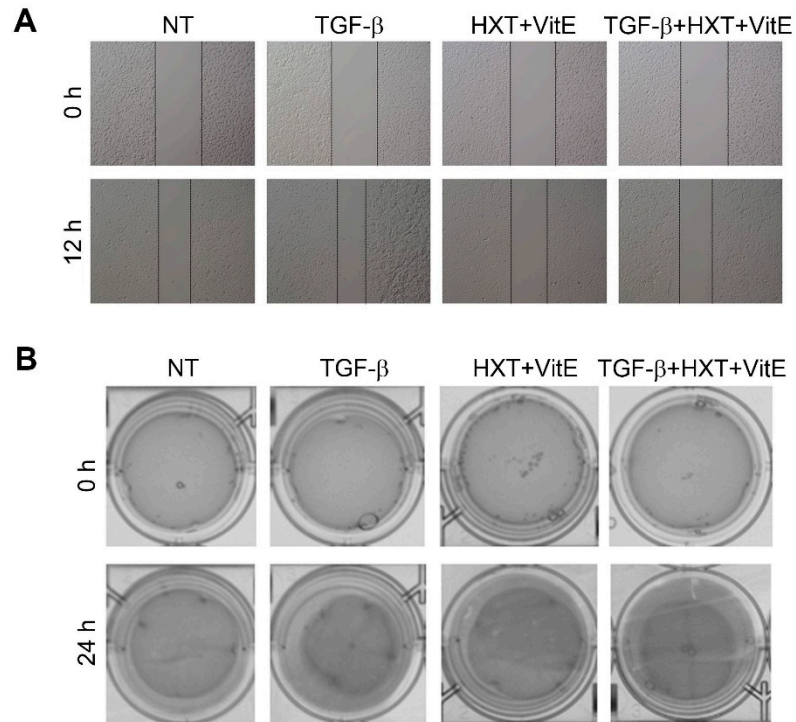

**Figure S3. Effects of treatments on LX-2 cells migration and contraction rate.** (A) Representative photographs of migration assay in LX-2 cells NT, treated with HXT+VitE, or treated with TGF- $\beta$  alone or with HXT+VitE at 0 and 12 h. (B) Representative photographs of contraction assay in LX-2 cells NT, treated with HXT+VitE, or treated with TGF- $\beta$  alone or with HXT+VitE at 0 and 24 h.
